# Supplementary material for: Mechanistic insights into hydroxy(tosyloxy)iodobenzene-mediated ditosyloxylation of chalcones: a DFT study
Source: publisher site journal article supplement (doi:10.3762/bjoc.21.208), 2025-12-16
Supplement: Additional file 1 [file 1860-5397-21-208-S1.pdf]

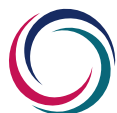

## Supporting Information

for

### **Mechanistic insights into hydroxy(tosyloxy)iodobenzene-mediated ditosyloxylation of chalcones: a DFT study**

Jai Parkash, Sangeeta Saini, Vaishali Saini, Omkar Bains and Raj Kamal

*Beilstein J. Org. Chem.* **2025**, 21, 2703–2715. doi:10.3762/bjoc.21.208

### **Free energy of intermediates and structures corresponding to various intermediates shown in free energy profiles**

**Table S1:** Free energy of intermediates involved in ditosyloxylation reaction of chalcones.

| Reactive Intermediates                                             | Total Gibbs free energy (a.u.) |
|--------------------------------------------------------------------|--------------------------------|
| Int2 + [PhIOH] <sup>+</sup> + [OTs] <sup>-</sup>                   | -3555.421206                   |
| Int3 + [PhIOH] <sup>+</sup> + [OTs] <sup>-</sup> + OH <sup>-</sup> | -3555.372379                   |
| Int3 + PhIO + H <sub>2</sub> O + OTs <sup>-</sup>                  | -3555.452820                   |

The lowering in Gibbs free energy from **Int2** to **Int3** only happens if the hydroxy group of **Int2** interacts with second molecule of dissociated HTIB to form PhIO and H<sub>2</sub>O.

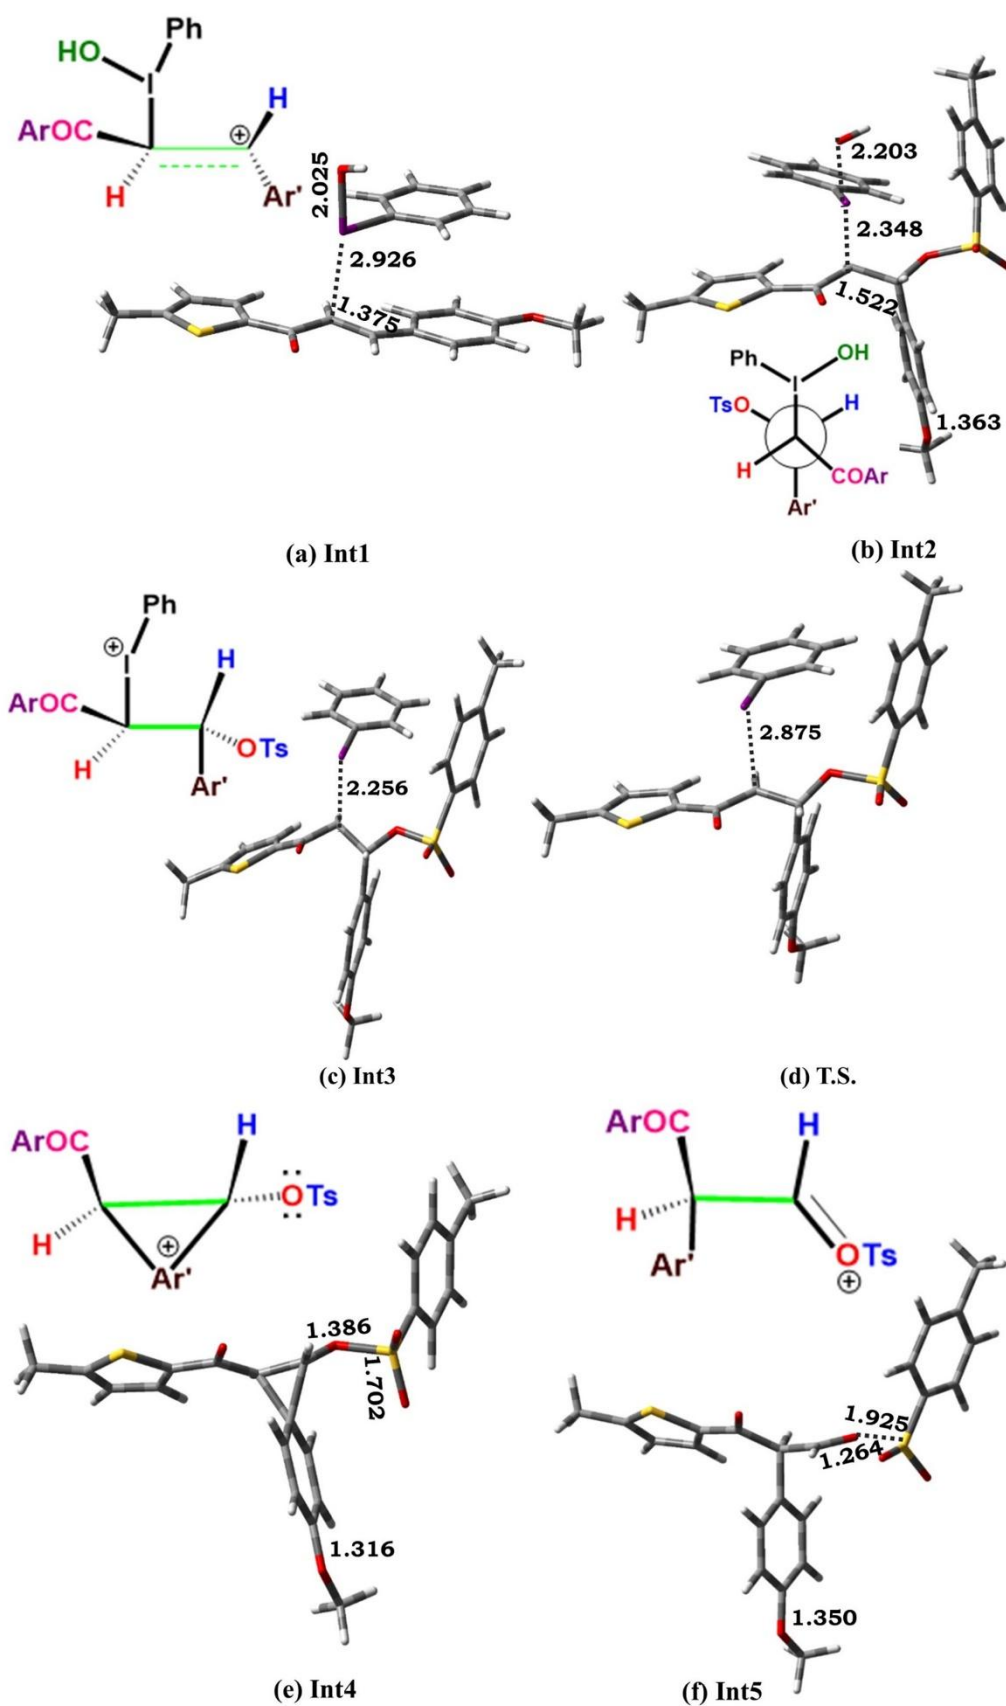

**Figure S1:** Structures corresponding to various intermediates listed in Table 1 for the reaction of a chalcone with X = -OCH<sub>3</sub>.

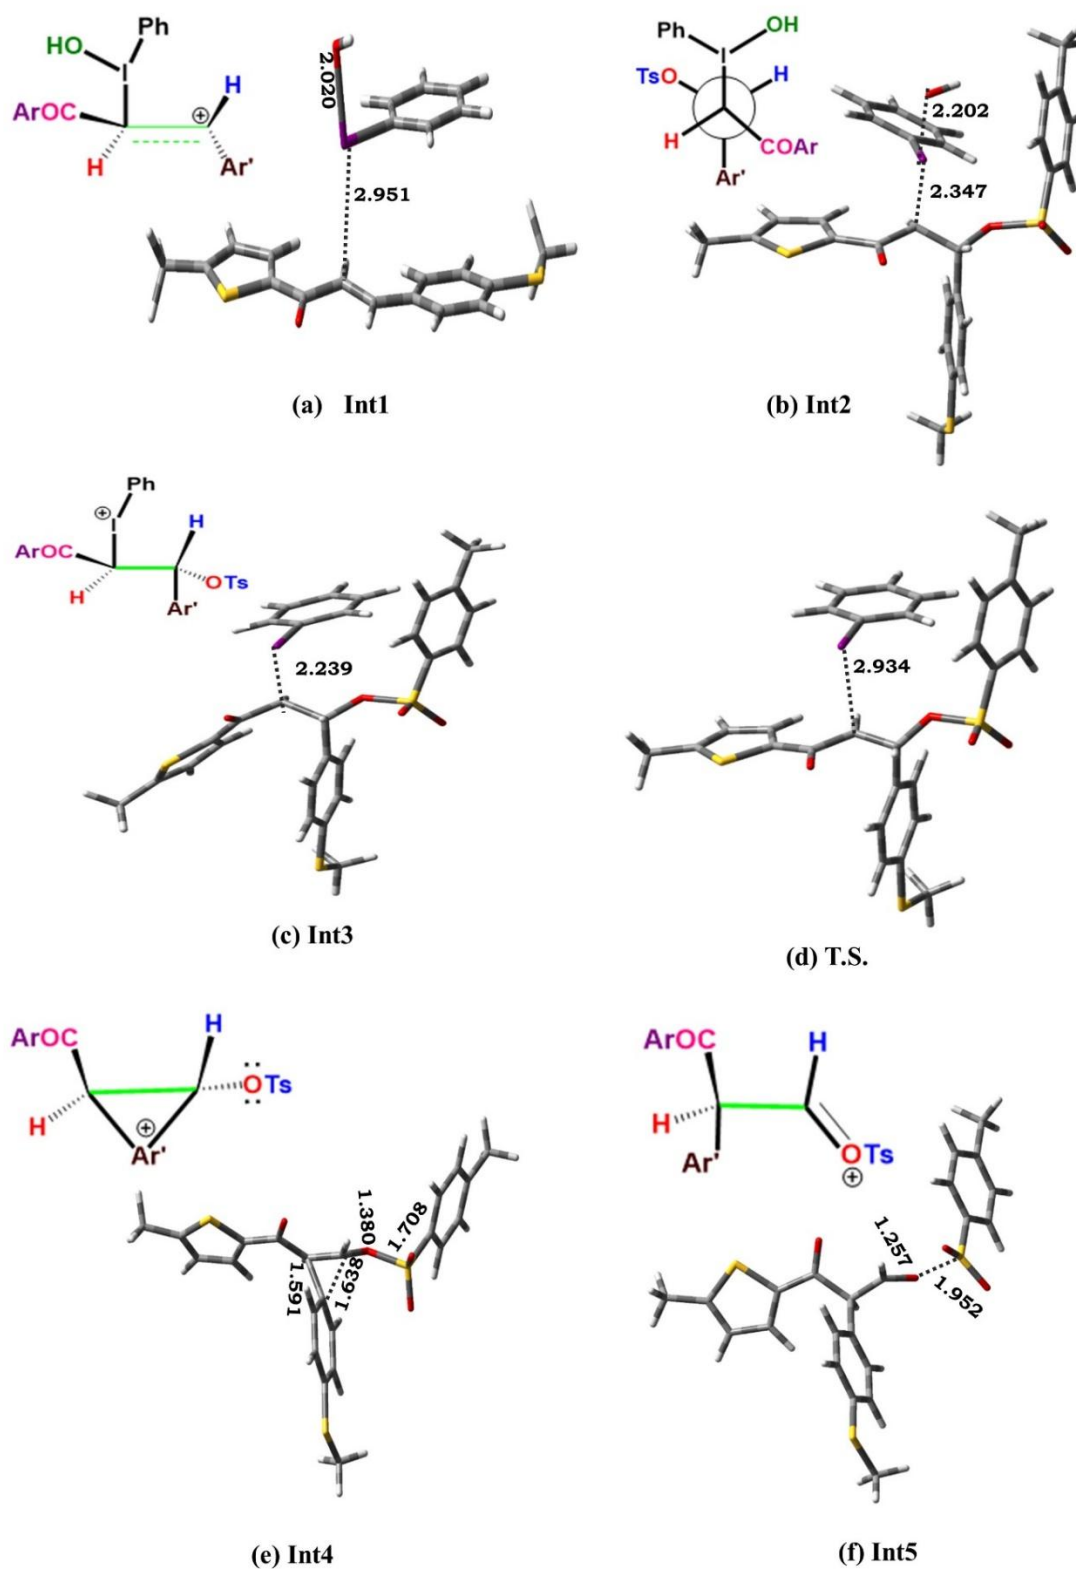

**Figure S2:** Structures corresponding to various intermediates shown in free energy profile presented in **Figure 1** for X = -SCH<sub>3</sub> leading to formation of  $\beta,\beta$ -ditosyloxy ketone.

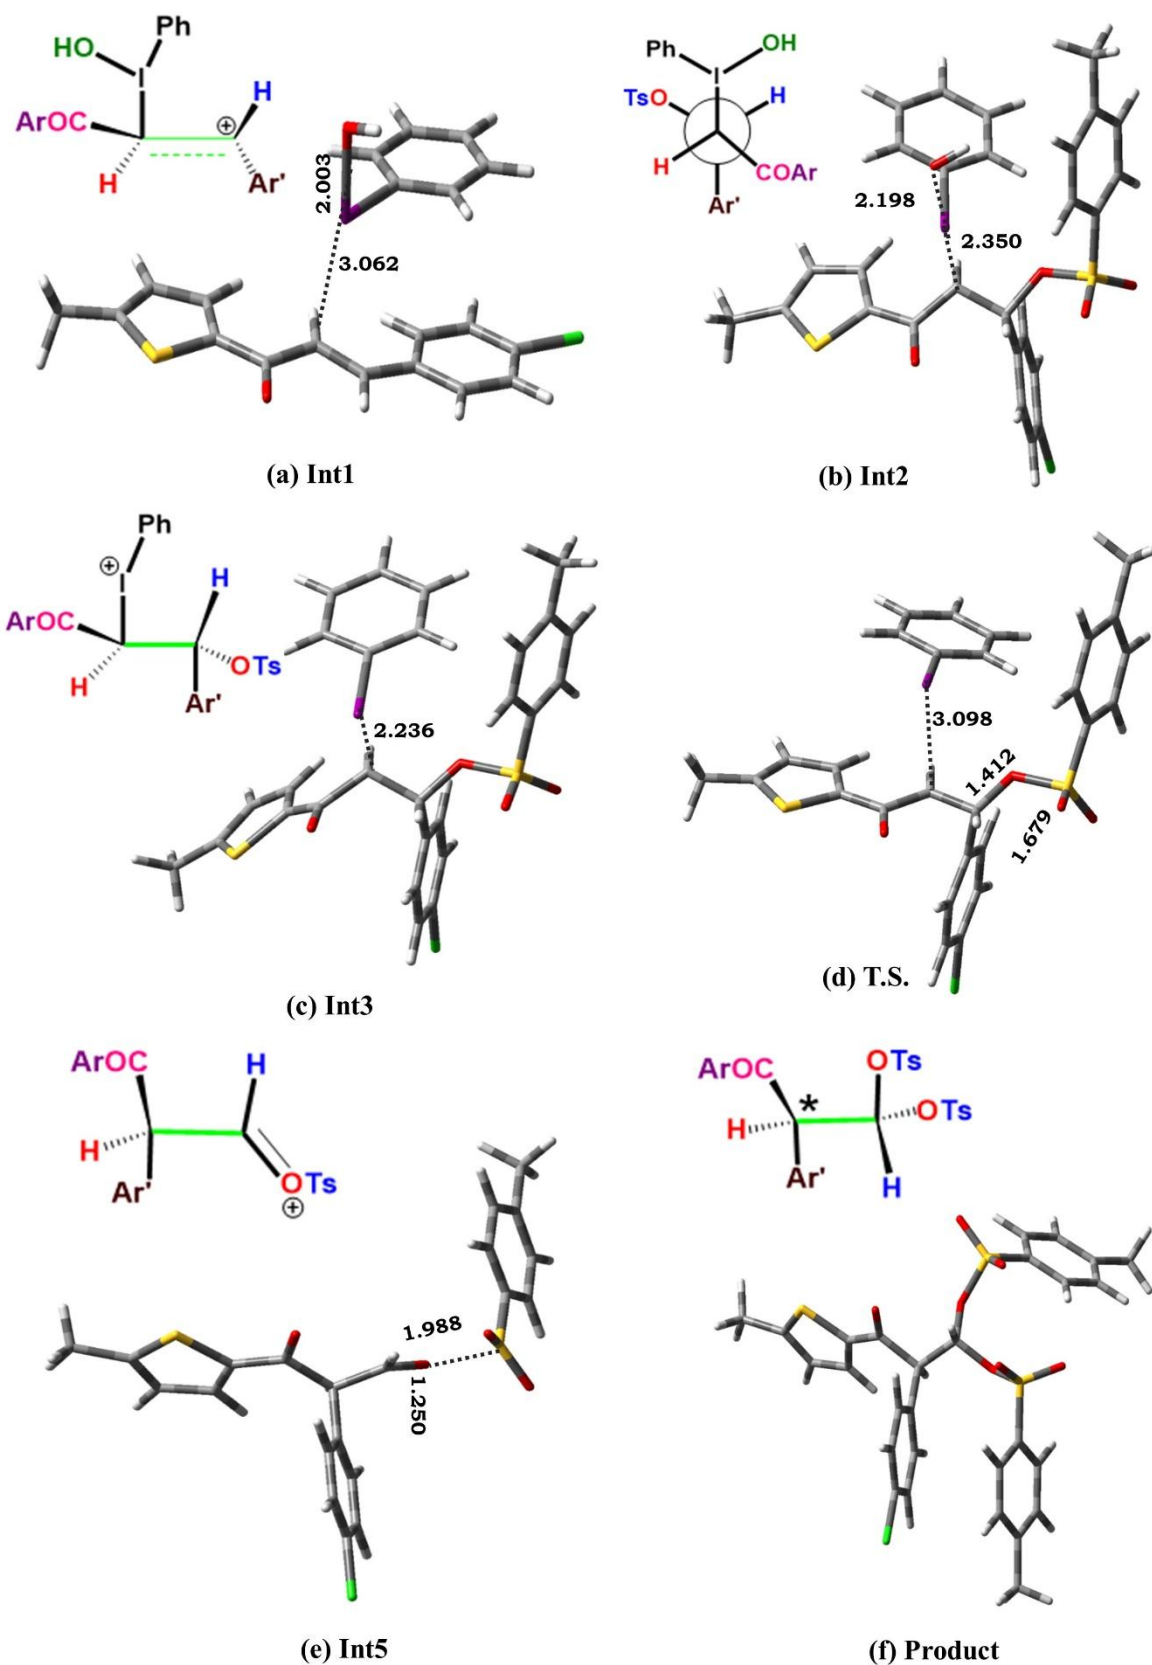

**Figure S3:** Structures corresponding to various intermediates shown in free energy profile presented in **Figure 2** for X = -Cl leading to formation of  $\beta,\beta$ -ditosyloxy ketone.

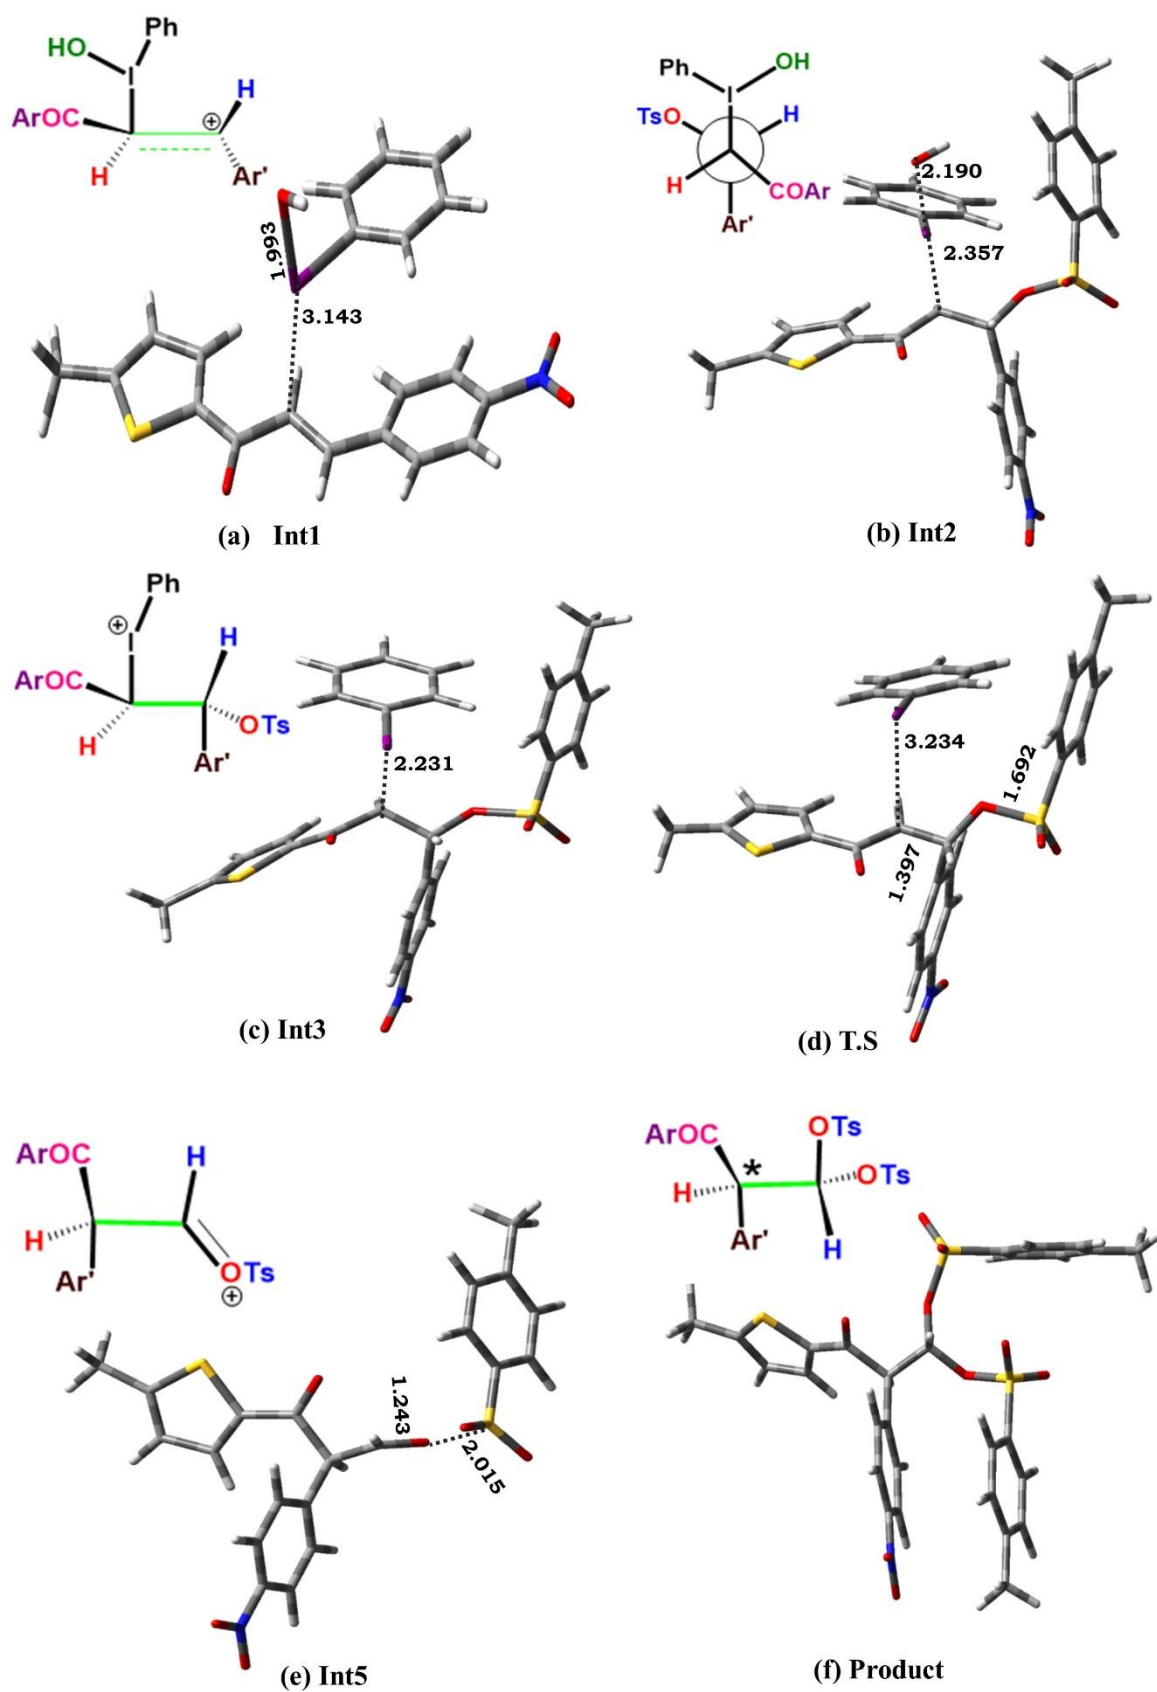

**Figure S4:** Structures corresponding to various intermediates shown in free energy profile presented in **Figure 3** for X = -NO<sub>2</sub> leading to formation of  $\beta,\beta$ -ditosyloxy ketone.

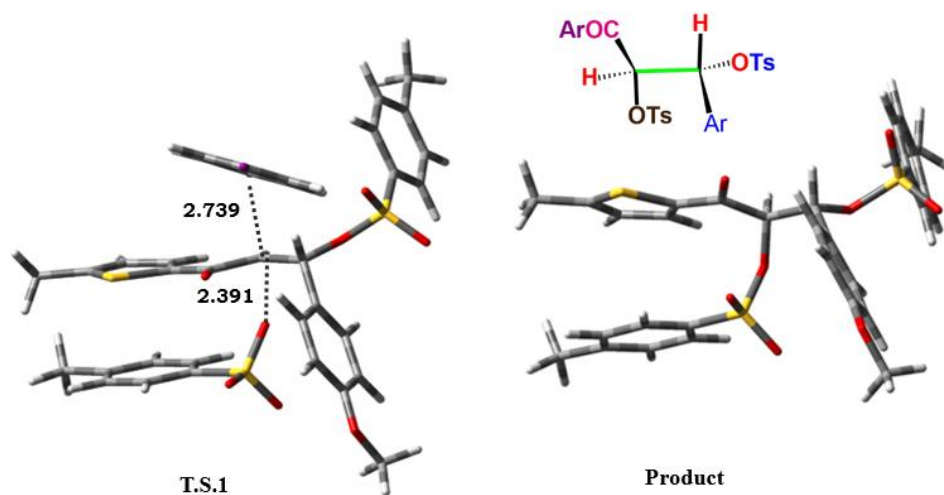

**Figure S5:** Optimized structure of transition state and product corresponding to free energy profile presented in **Figure 4** for X = -OCH<sub>3</sub>. Product is α,β-ditosyloxy ketone. Important bond lengths are reported in Å.

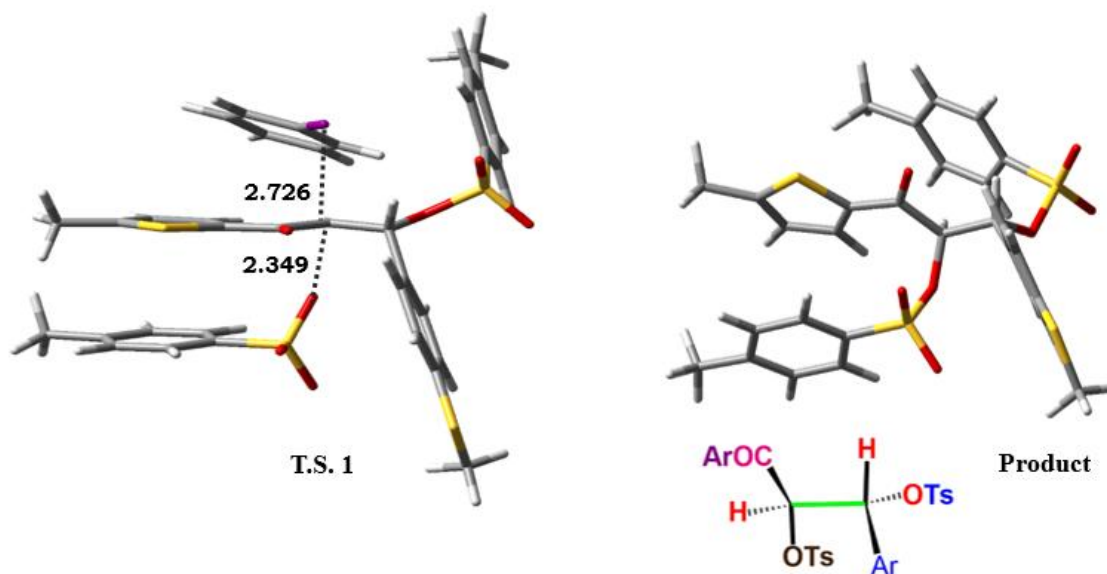

**Figure S6:** Optimized structure of transition state and product corresponding to free energy profile presented in **Figure 5** for X = -SCH<sub>3</sub>. Product is α,β-ditosyloxy ketone. Important bond lengths are reported in Å.

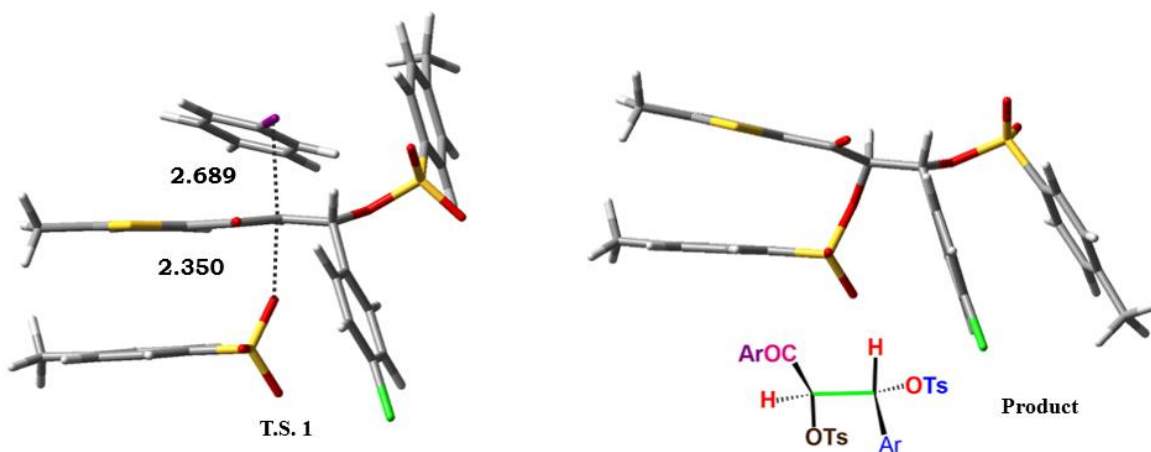

**Figure S7:** Optimized structure of transition state and product corresponding to free energy profile presented in **Figure 6** for X = -Cl. Product is  $\alpha,\beta$ -ditosyloxy ketone. Important bond lengths are reported in Å.

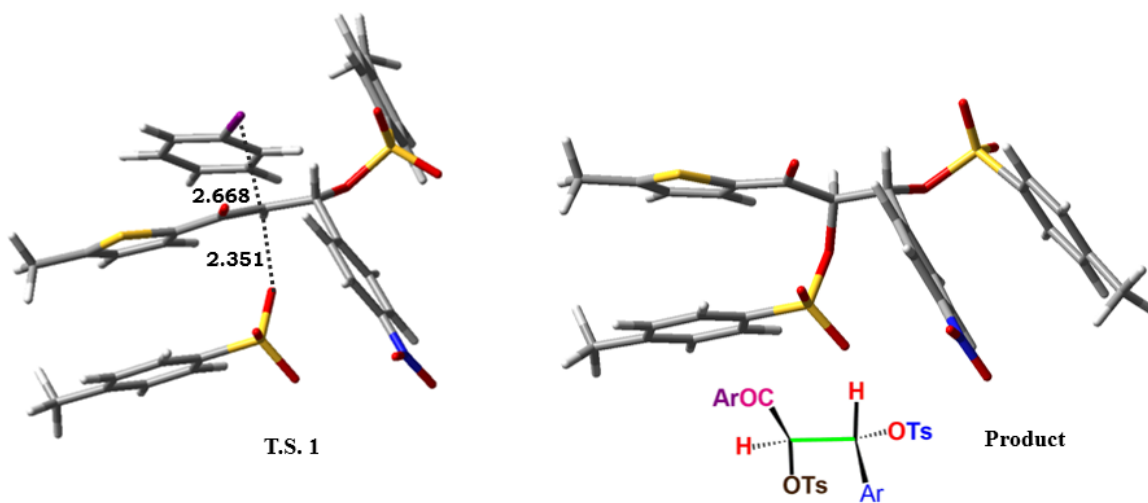

**Figure S8:** Optimized structure of transition state and product corresponding to free energy profile presented in **Figure 7** for X = -NO<sub>2</sub>. Product is  $\alpha,\beta$ -ditosyloxy ketone. Important bond lengths are reported in Å.
